# Supplementary material for: Strategies to suppress cation vacancies in metal oxide alloys: consequences for solar energy conversion
Source: Springer Nature journal article supplement (doi:10.1007/s10853-015-9113-y), 2015-06-03
Supplement: MOESM1 [file 3532166]

**Supplementary Information**

**Iron vacancy formation energies and unit cell structures**

We used several unit cells for pure and alloyed FeO containing one iron vacancy. These cells differed in the position of the alloying metal cations and in the location of the vacancy-generated holes (Table S1 and Table S2 specify the structure of each cell, specifically the fractional coordinates and lattice vectors, respectively). These models for FeO alloys involved ordered distributions of cations around the vacancy rather than random distributions, which is of course an approximation to the likely case in a real sample. However, calculations considering full randomness in the placement of both metal cations and the vacancy would require supercell sizes that would be prohibitively expensive to calculate. Hence, we considered a wide range of ordered alloys instead. The criteria for distributing the metal cations was to construct cells with different numbers of non-Fe cations placed close to the vacancy and placed on sites that in pure FeO occupy vacancy-generated holes. The location of the iron vacancy was chosen to be at the center of the unit cells. As can be seen in Figure S1, the formation energy depends strongly on the metal and hole ordering (Figure 2 in the main text includes the average and range of these formation energies).


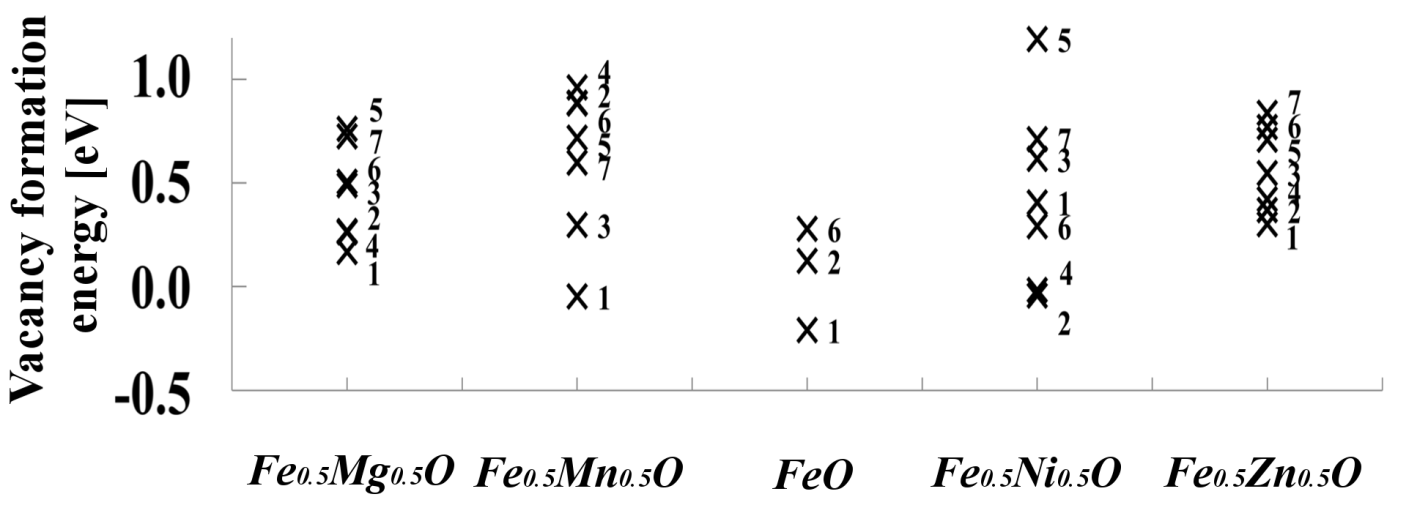


**Figure S1.** PBE+U iron vacancy formation energy for pure and alloyed FeO under oxygen-rich conditions. The formation energy was calculated for seven cells that differ by alloying metal cation ordering and hole locations (the cell number is shown near each data point). For pure FeO, the formation energy was calculated for three different hole locations.

**Table S1.** Sample optimized unit cell fractional coordinates of cells with an iron vacancy. The primary location of two vacancy-generated holes is indicated by gray-shaded rows. These cell parameters are shown for Fe0.5Zn0.5O since other alloys have the same hole locations, and consequently have similar deviations in bond distances compared to the host cells.

| **Cell number** | **Atom type** | **Atom number** | **Fractional coordinates** |
| --- | --- | --- | --- |
| | **X** | **Y** | **Z** | | --- | --- | --- | |
| **1** | O | 1  2  3  4  5  6  7  8  9  10  11  12  13  14  15  16 | | 0.122 | 0.119 | 0.137 | | --- | --- | --- | | 0.369 | 0.385 | 0.375 | | 0.622 | 0.144 | 0.111 | | 0.908 | 0.360 | 0.368 | | 0.116 | 0.626 | 0.131 | | 0.374 | 0.909 | 0.354 | | 0.640 | 0.627 | 0.096 | | 0.857 | 0.886 | 0.382 | | 0.149 | 0.111 | 0.614 | | 0.356 | 0.378 | 0.902 | | 0.621 | 0.096 | 0.646 | | 0.891 | 0.372 | 0.865 | | 0.089 | 0.643 | 0.633 | | 0.384 | 0.857 | 0.883 | | 0.642 | 0.616 | 0.613 | | 0.866 | 0.882 | 0.874 | |
|  | Fe (positive spin) | 17  18  19 | | 0.503 | 0.501 | 0.998 | | --- | --- | --- | | 0.502 | 0.000 | 0.498 | | 0.002 | 0.499 | 0.497 | |
|  | Fe (negative spin) | 20  21  22  23 | | 0.252 | 0.253 | 0.246 | | --- | --- | --- | | 0.253 | 0.252 | 0.751 | | 0.255 | 0.747 | 0.742 | | 0.748 | 0.748 | 0.753 | |
|  | M (positive spin) | 24  25  26  27 | | 0.998 | 0.998 | 0.004 | | --- | --- | --- | | 0.498 | 1.000 | 0.003 | | 1.000 | 0.499 | 1.000 | | 0.002 | 0.997 | 0.502 | |
|  | M (negative spin) | 28  29  30  31 | | 0.740 | 0.255 | 0.267 | | --- | --- | --- | | 0.259 | 0.740 | 0.263 | | 0.744 | 0.740 | 0.254 | | 0.739 | 0.260 | 0.740 | |
| **2** | O | 1  2  3  4  5  6  7  8  9  10  11  12  13  14  15  16 | | 0.146 | 0.124 | 0.105 | | --- | --- | --- | | 0.362 | 0.377 | 0.394 | | 0.621 | 0.132 | 0.133 | | 0.906 | 0.352 | 0.363 | | 0.111 | 0.628 | 0.138 | | 0.395 | 0.883 | 0.345 | | 0.621 | 0.638 | 0.109 | | 0.872 | 0.891 | 0.371 | | 0.128 | 0.106 | 0.634 | | 0.378 | 0.365 | 0.888 | | 0.600 | 0.118 | 0.653 | | 0.896 | 0.367 | 0.867 | | 0.104 | 0.627 | 0.641 | | 0.370 | 0.880 | 0.872 | | 0.632 | 0.615 | 0.632 | | 0.860 | 0.886 | 0.873 | |
|  | Fe (positive spin) | 17  18  19 | | 0.503 | 0.997 | 0.003 | | --- | --- | --- | | 0.006 | 0.994 | 0.497 | | 0.994 | 0.501 | 0.009 | |
|  | Fe (negative spin) | 20  21  22  23 | | 0.740 | 0.264 | 0.258 | | --- | --- | --- | | 0.747 | 0.741 | 0.256 | | 0.255 | 0.268 | 0.737 | | 0.260 | 0.737 | 0.740 | |
|  | M (positive spin) | 24  25  26  27 | | 0.501 | 0.997 | 0.500 | | --- | --- | --- | | 0.996 | 0.002 | 0.000 | | 0.495 | 0.504 | 0.998 | | 0.998 | 0.497 | 0.503 | |
|  | M (negative spin) | 28  29  30  31 | | 0.257 | 0.246 | 0.249 | | --- | --- | --- | | 0.250 | 0.751 | 0.252 | | 0.751 | 0.259 | 0.730 | | 0.744 | 0.752 | 0.750 | |
| **3** | O | 1  2  3  4  5  6  7  8  9  10  11  12  13  14  15  16 | | 0.133 | 0.133 | 0.108 | | --- | --- | --- | | 0.362 | 0.375 | 0.396 | | 0.603 | 0.142 | 0.141 | | 0.909 | 0.357 | 0.363 | | 0.111 | 0.622 | 0.137 | | 0.373 | 0.908 | 0.355 | | 0.634 | 0.632 | 0.095 | | 0.883 | 0.879 | 0.370 | | 0.120 | 0.116 | 0.628 | | 0.367 | 0.372 | 0.903 | | 0.611 | 0.117 | 0.635 | | 0.904 | 0.352 | 0.872 | | 0.116 | 0.630 | 0.628 | | 0.376 | 0.865 | 0.871 | | 0.638 | 0.615 | 0.619 | | 0.865 | 0.879 | 0.877 | |
|  | Fe (positive spin) | 17  18  19 | | 0.500 | 0.996 | 0.504 | | --- | --- | --- | | 0.503 | 0.500 | 1.000 | | 0.999 | 0.496 | 0.503 | |
|  | Fe (negative spin) | 20  21  22  23 | | 0.251 | 0.280 | 0.734 | | --- | --- | --- | | 0.254 | 0.745 | 0.746 | | 0.250 | 0.251 | 0.250 | | 0.756 | 0.745 | 0.744 | |
|  | M (positive spin) | 24  25  26  27 | | 0.502 | 0.003 | 0.994 | | --- | --- | --- | | 0.006 | 0.991 | 0.503 | | 0.998 | 0.994 | 0.008 | | 0.986 | 0.505 | 0.008 | |
|  | M (negative spin) | 28  29  30  31 | | 0.744 | 0.256 | 0.260 | | --- | --- | --- | | 0.741 | 0.734 | 0.261 | | 0.260 | 0.752 | 0.248 | | 0.743 | 0.256 | 0.738 | |
| **4** | O | 1  2  3  4  5  6  7  8  9  10  11  12  13  14  15  16 | | 0.145 | 0.123 | 0.105 | | --- | --- | --- | | 0.361 | 0.376 | 0.396 | | 0.620 | 0.133 | 0.133 | | 0.907 | 0.352 | 0.363 | | 0.112 | 0.628 | 0.138 | | 0.395 | 0.884 | 0.345 | | 0.620 | 0.638 | 0.110 | | 0.872 | 0.891 | 0.371 | | 0.128 | 0.107 | 0.634 | | 0.379 | 0.364 | 0.888 | | 0.600 | 0.117 | 0.653 | | 0.896 | 0.368 | 0.867 | | 0.104 | 0.626 | 0.642 | | 0.370 | 0.880 | 0.872 | | 0.632 | 0.616 | 0.630 | | 0.860 | 0.886 | 0.873 | |
|  | Fe (positive spin) | 17  18  19 | | 0.502 | 0.998 | 0.003 | | --- | --- | --- | | 0.994 | 0.500 | 0.010 | | 0.007 | 0.994 | 0.498 | |
|  | Fe (negative spin) | 20  21  22  23 | | 0.740 | 0.264 | 0.258 | | --- | --- | --- | | 0.747 | 0.741 | 0.255 | | 0.255 | 0.267 | 0.738 | | 0.260 | 0.738 | 0.739 | |
|  | M (positive spin) | 24  25  26  27 | | 0.996 | 0.003 | 1.000 | | --- | --- | --- | | 0.496 | 0.505 | 0.997 | | 0.999 | 0.498 | 0.502 | | 0.501 | 0.998 | 0.500 | |
|  | M (negative spin) | 28  29  30  31 | | 0.258 | 0.247 | 0.248 | | --- | --- | --- | | 0.250 | 0.750 | 0.253 | | 0.751 | 0.259 | 0.729 | | 0.743 | 0.752 | 0.751 | |
| **5** | O | 1  2  3  4  5  6  7  8  9  10  11  12  13  14  15  16 | | 0.137 | 0.131 | 0.108 | | --- | --- | --- | | 0.365 | 0.378 | 0.392 | | 0.614 | 0.132 | 0.141 | | 0.912 | 0.348 | 0.365 | | 0.105 | 0.628 | 0.143 | | 0.402 | 0.888 | 0.333 | | 0.628 | 0.639 | 0.098 | | 0.874 | 0.889 | 0.373 | | 0.122 | 0.101 | 0.642 | | 0.379 | 0.369 | 0.883 | | 0.585 | 0.121 | 0.660 | | 0.900 | 0.362 | 0.862 | | 0.106 | 0.636 | 0.629 | | 0.372 | 0.872 | 0.874 | | 0.631 | 0.611 | 0.632 | | 0.863 | 0.883 | 0.869 | |
|  | Fe (positive spin) | 17  18  19 | | 0.504 | 0.019 | 0.980 | | --- | --- | --- | | 0.498 | 0.997 | 0.506 | | 0.498 | 0.499 | 0.005 | |
|  | Fe (negative spin) | 20  21  22  23 | | 0.747 | 0.742 | 0.256 | | --- | --- | --- | | 0.236 | 0.283 | 0.740 | | 0.262 | 0.737 | 0.742 | | 0.752 | 0.746 | 0.747 | |
|  | M (positive spin) | 24  25  26  27 | | 0.041 | 0.976 | 0.491 | | --- | --- | --- | | 0.994 | 0.998 | 0.007 | | 0.998 | 0.493 | 0.505 | | 0.978 | 0.503 | 0.021 | |
|  | M (negative spin) | 28  29  30  31 | | 0.734 | 0.257 | 0.277 | | --- | --- | --- | | 0.256 | 0.249 | 0.247 | | 0.254 | 0.754 | 0.248 | | 0.754 | 0.260 | 0.726 | |
| **6** | O | 1  2  3  4  5  6  7  8  9  10  11  12  13  14  15  16 | | 0.139 | 0.132 | 0.102 | | --- | --- | --- | | 0.366 | 0.374 | 0.393 | | 0.615 | 0.138 | 0.134 | | 0.886 | 0.370 | 0.373 | | 0.092 | 0.636 | 0.144 | | 0.381 | 0.888 | 0.363 | | 0.634 | 0.626 | 0.103 | | 0.885 | 0.889 | 0.360 | | 0.116 | 0.110 | 0.640 | | 0.365 | 0.375 | 0.897 | | 0.618 | 0.113 | 0.637 | | 0.909 | 0.362 | 0.856 | | 0.113 | 0.631 | 0.627 | | 0.386 | 0.860 | 0.867 | | 0.634 | 0.625 | 0.607 | | 0.860 | 0.868 | 0.898 | |
|  | Fe (positive spin) | 17  18  19 | | 0.500 | 0.999 | 0.500 | | --- | --- | --- | | 0.501 | 0.499 | 0.000 | | 0.000 | 0.500 | 0.500 | |
|  | Fe (negative spin) | 20  21  22  23 | | 0.747 | 0.259 | 0.252 | | --- | --- | --- | | 0.735 | 0.722 | 0.276 | | 0.263 | 0.280 | 0.724 | | 0.253 | 0.741 | 0.749 | |
|  | M (positive spin) | 24  25  26  27 | | 0.500 | 0.002 | 0.998 | | --- | --- | --- | | 0.001 | 1.000 | 0.499 | | 0.001 | 0.999 | 0.000 | | 1.000 | 0.500 | 0.000 | |
|  | M (negative spin) | 28  29  30  31 | | 0.248 | 0.249 | 0.254 | | --- | --- | --- | | 0.259 | 0.754 | 0.246 | | 0.741 | 0.246 | 0.753 | | 0.751 | 0.752 | 0.746 | |
| **7** | O | 1  2  3  4  5  6  7  8  9  10  11  12  13  14  15  16 | | 0.131 | 0.135 | 0.109 | | --- | --- | --- | | 0.367 | 0.378 | 0.390 | | 0.626 | 0.105 | 0.144 | | 0.911 | 0.364 | 0.356 | | 0.143 | 0.617 | 0.129 | | 0.382 | 0.889 | 0.345 | | 0.622 | 0.648 | 0.096 | | 0.873 | 0.889 | 0.372 | | 0.122 | 0.100 | 0.646 | | 0.383 | 0.364 | 0.881 | | 0.601 | 0.123 | 0.648 | | 0.876 | 0.372 | 0.873 | | 0.106 | 0.626 | 0.635 | | 0.359 | 0.905 | 0.863 | | 0.637 | 0.611 | 0.624 | | 0.863 | 0.879 | 0.874 | |
|  | Fe (positive spin) | 17  18  19 | | 0.499 | 0.010 | 0.995 | | --- | --- | --- | | 0.499 | 0.995 | 0.504 | | 0.505 | 0.499 | 0.000 | |
|  | Fe (negative spin) | 20  21  22  23 | | 0.249 | 0.268 | 0.741 | | --- | --- | --- | | 0.262 | 0.734 | 0.743 | | 0.261 | 0.246 | 0.248 | | 0.742 | 0.756 | 0.746 | |
|  | M (positive spin) | 24  25  26  27 | | 0.012 | 0.991 | 0.499 | | --- | --- | --- | | 0.996 | 0.995 | 0.008 | | 0.002 | 0.492 | 0.501 | | 0.990 | 0.504 | 0.007 | |
|  | M (negative spin) | 28  29  30  31 | | 0.735 | 0.264 | 0.266 | | --- | --- | --- | | 0.740 | 0.735 | 0.264 | | 0.249 | 0.752 | 0.256 | | 0.755 | 0.253 | 0.734 | |

**Table S2.** Sample optimized lattice constants and angles of unit cells with an iron vacancy. These parameters are shown only for the Fe0.5Zn0.5O alloy as a representative case.

| **Cell number** | **Lattice constants (Å)** | **Lattice angles (o)** |
| --- | --- | --- |
| **1** | 10.607, 10.610, 10.657 | 33.67, 33.65, 33.60 |
| **2** | 10.575, 10.477, 10.587 | 33.79, 33.94, 33.66 |
| **3** | 10.591, 10.600, 10.624 | 33.73, 33.68, 33.61 |
| **4** | 10.576, 10.474, 10.598 | 33.79, 33.95, 33.67 |
| **5** | 10.632, 10.511, 10.585 | 33.73, 34.01, 33.59 |
| **6** | 10.581, 10.582, 10.635 | 33.71, 33.67, 33.51 |
| **7** | 10.603, 10.545, 10.588 | 33.61, 33.80, 33.59 |
